# Supplementary material for: The synthesis and characterisation of Cu2MX4(M = W or Mo; X = S, Se or S/Se) materials prepared by a solvothermal method
Source: Royal Society of Chemistry journal article supplement (doi:10.1039/b507129a), 2005-01-01
Supplement: b507129a.pdf [file b507129a.pdf]

# The synthesis and characterisation of $\text{Cu}_2\text{MX}_4$ ( $\text{M} = \text{W}$ or $\text{Mo}$ ; $\text{X} = \text{S}$ , $\text{Se}$ or $\text{S/Se}$ ) materials prepared by a solvothermal method

Clare J. Crossland, Peter J. Hickey and John S. O. Evans\*

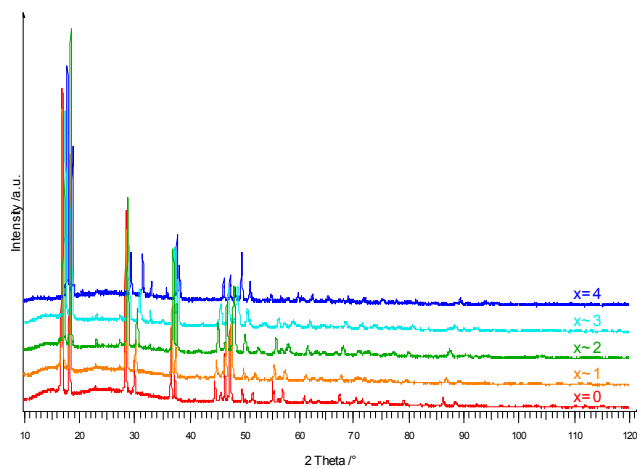

Figure S1 XRD patterns of  $\text{Cu}_2\text{WS}_x\text{Se}_{4-x}$  phases, patterns are offset in the  $y$ -direction for clarity.

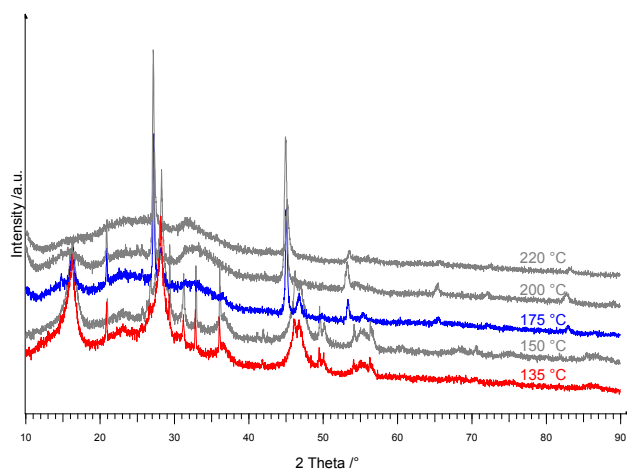

Figure S2 XRD patterns of  $\text{Cu}_2\text{MoSe}_4$  synthesised at different temperatures, patterns are offset in the  $y$ -direction for clarity.

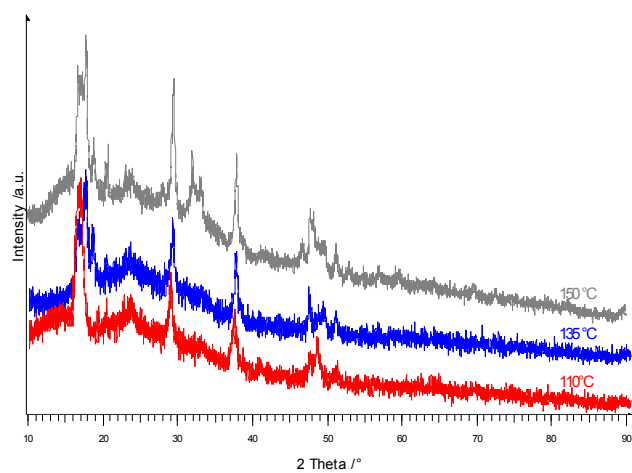

Figure S3 XRD patterns for  $\text{Cu}_2\text{MoS}_4$  synthesised at different temperatures, patterns are offset in the  $y$ -direction for clarity.
